# Supplementary material for: Photoinduced DNA cleavage by formation of ROS from oxygen with a neurotransmitter and aromatic amino acids
Source: Royal Society of Chemistry journal article supplement (doi:10.1039/b924560j), 2010-01-01
Supplement: b924560j.pdf [file b924560j.pdf]

## Electronic Supplementary Information (ESI)

### **Photoinduced DNA Cleavage by Formation of ROS from Oxygen with a Neurotransmitter and Aromatic Amino Acids**

Tomonori Kawashima,<sup>a</sup> Kei Ohkubo<sup>a</sup> and Shunichi Fukuzumi<sup>\*a,b</sup>

<sup>a</sup> Department of Material and Life Science, Graduate School of Engineering, Osaka University, SORST, Japan Science and Technology Agency (JST), Yamada-oka 2-1, Suita, Osaka 565-0871, Japan

<sup>b</sup> Department of Bioinspired Science, Ewha Womans University, Seoul 120-750, Korea

E-mail: [fukuzumi@chem.eng.osaka-u.ac.jp](mailto:fukuzumi@chem.eng.osaka-u.ac.jp)

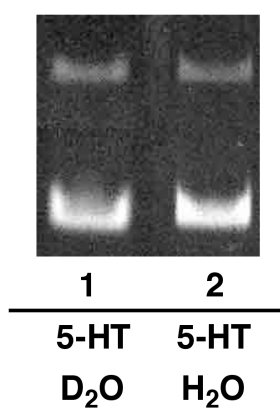

**Fig S1** Agarose gel electrophoresis of cleaved supercoiled pBR322 DNA after 10 min photoirradiation with monochromatized light ( $\lambda = 300$  nm) at 298 K. Lane 1, with 5-HT ( $0.50 \text{ mmol dm}^{-3}$ ) in D<sub>2</sub>O; lane 2, photoirradiation with 5-HT ( $0.50 \text{ mmol dm}^{-3}$ ) in H<sub>2</sub>O.

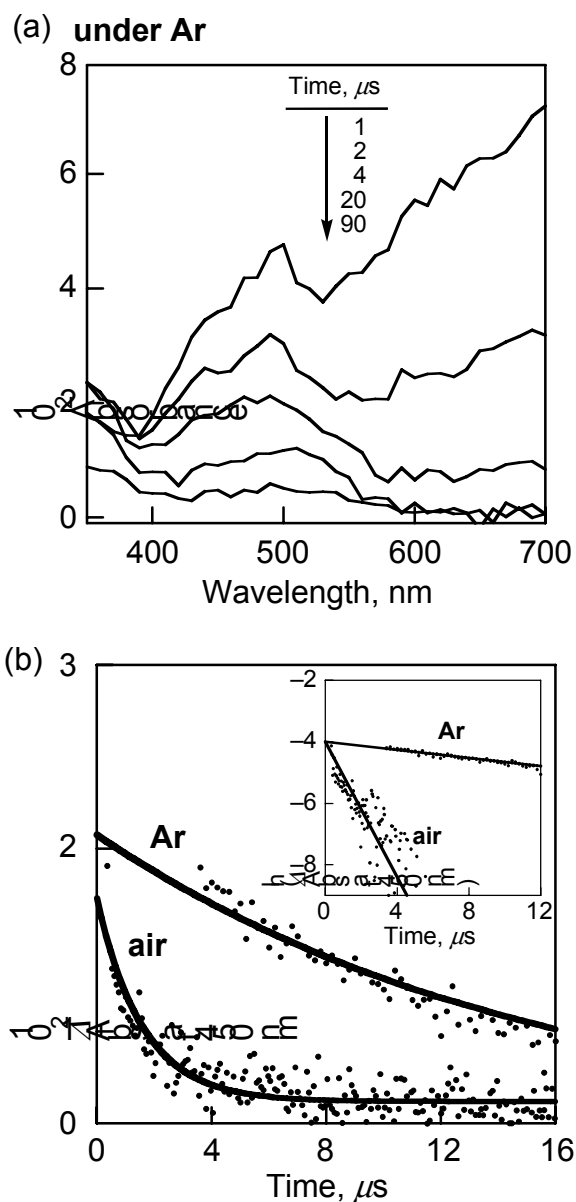

**Fig S2** (a) Transient absorption spectra of Trp ( $1.9 \times 10^{-4} \text{ mol dm}^{-3}$ ) in a phosphate buffer solution ( $0.10 \text{ mol dm}^{-3}$ , pH 7.0) after laser excitation at 266 nm. (b) Decay time profiles of <sup>3</sup>Trp\* ( $\lambda = 450 \text{ nm}$ ) in argon- and air-saturated buffer solutions. The solid curves represent the best fit to the exponential decay. Inset: First order plots.

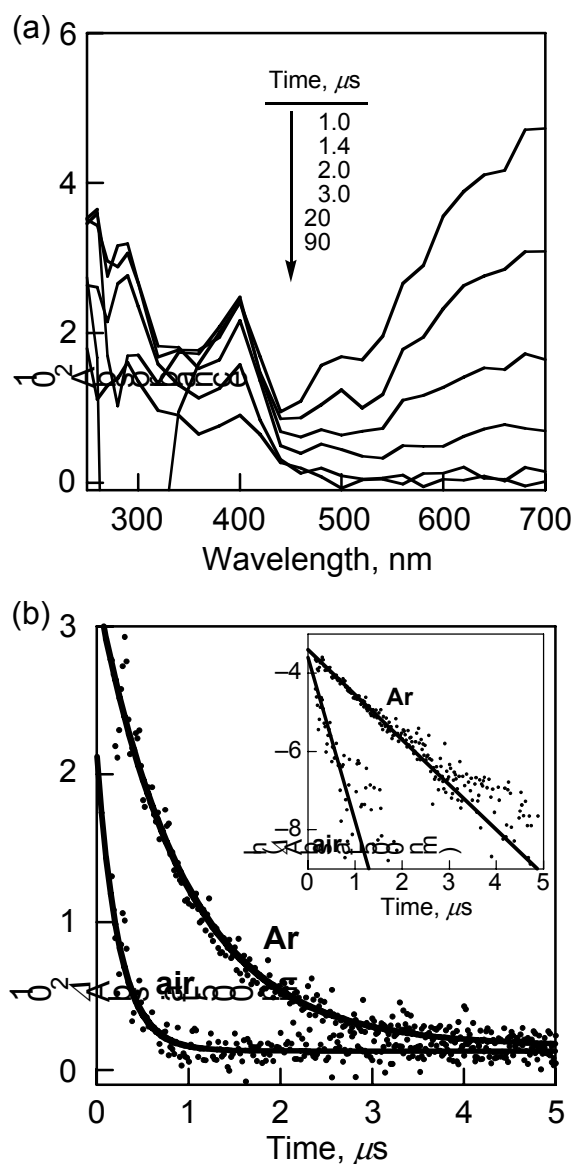

**Fig S3** (a) Transient absorption spectra of Tyr ( $7.5 \times 10^{-4} \text{ mol dm}^{-3}$ ) in a phosphate buffer solution ( $0.10 \text{ mol dm}^{-3}$ , pH 7.0) after laser excitation at 266 nm. (b) Decay time profiles of  $^3\text{Tyr}^*$  ( $\lambda = 500 \text{ nm}$ ) in argon- and air-saturated buffer solutions. The solid curves represent the best fit to the exponential decay. Inset: First order plots.
